# Supplementary material for: Syntheses, structures, and photoluminescent properties of ten metal–organic frameworks constructed by a flexible tetracarboxylate ligand
Source: Royal Society of Chemistry journal article supplement (doi:10.1039/c3ce26864k), 2013-01-01
Supplement: c3ce26864k.pdf [file c3ce26864k.pdf]

## Syntheses, Structures, and Photoluminescent Properties of Ten Metal–Organic Frameworks Constructed by a Flexible Tetracarboxylate Ligand

Xiang He,<sup>\*,ab</sup> Xiao-Peng Lu,<sup>a</sup> Zhan-Feng Ju,<sup>b</sup> Chun-Ju Li,<sup>a</sup> Qi-Kai Zhang,<sup>b</sup> and Ming-Xing

Li<sup>\*,a</sup>

<sup>a</sup> Department of Chemistry, College of Sciences, Shanghai University, Shanghai 200444, China.

<sup>b</sup> State Key Laboratory of Structural Chemistry, Fujian Institute of Research on the structure of Matter, Chinese Academy of Sciences, Fuzhou, Fujian 350002, China

\* Corresponding author. E-mail: hexiang23@gmail.com, mx\_li@mail.shu.edu.cn.

**Table S1.** Selected bond distances (Å) and angles (°) for compounds **1-10**

| Compound 1    |           |                       |            |                       |            |
|---------------|-----------|-----------------------|------------|-----------------------|------------|
| O(1)-Zn(1)    | 2.135(3)  | O(10)#3-Zn(1)-O(11)   | 99.63(13)  | O(12)-Zn(1)-O(13)     | 99.16(16)  |
| O(2)-Zn(2)    | 1.955(3)  | O(10)#3-Zn(1)-O(1)    | 83.92(14)  | O(12)-Zn(2)-O(12)#6   | 86.11(13)  |
| O(3)-Zn(3)    | 2.135(4)  | O(10)#3-Zn(1)-O(12)   | 92.33(16)  | O(13)-Zn(1)-O(1)      | 82.25(15)  |
| O(7)-Zn(2)#1  | 1.891(3)  | O(10)#3-Zn(1)-O(13)   | 162.07(18) | O(2)-Zn(2)-O(12)      | 117.30(13) |
| O(9)-Zn(3)#2  | 1.996(3)  | O(11)#5-Zn(3)-O(15)   | 178.20(14) | O(2)-Zn(2)-O(12)#6    | 106.02(13) |
| O(10)-Zn(1)#3 | 2.024(3)  | O(11)#5-Zn(3)-O(3)    | 90.23(14)  | O(3)-Zn(3)-O(15)      | 88.01(15)  |
| O(13)-Zn(1)   | 2.072(4)  | O(11)#8-Zn(3)-O(11)#5 | 85.66(12)  | O(7)#10-Zn(2)-O(12)   | 106.54(15) |
| O(11)-Zn(3)#4 | 2.040(3)  | O(11)#8-Zn(3)-O(15)   | 95.65(15)  | O(7)#10-Zn(2)-O(12)#6 | 117.23(15) |
| O(11)-Zn(1)   | 2.045(3)  | O(11)#8-Zn(3)-O(3)    | 149.59(13) | O(7)#10-Zn(2)-O(2)    | 119.30(15) |
| O(11)-Zn(3)#5 | 2.107(3)  | O(11)-Zn(1)-O(1)      | 171.07(13) | O(9)#7-Zn(3)-O(11)#5  | 98.46(13)  |
| O(12)-Zn(2)   | 1.997(3)  | O(11)-Zn(1)-O(12)     | 97.41(12)  | O(9)#7-Zn(3)-O(11)#8  | 102.41(15) |
| O(12)-Zn(2)#6 | 2.011(3)  | O(11)-Zn(1)-O(13)     | 92.53(14)  | O(9)#7-Zn(3)-O(15)    | 82.49(15)  |
| O(12)-Zn(1)   | 2.054(3)  | O(12)-Zn(1)-O(1)      | 90.60(13)  | O(9)#7-Zn(3)-O(3)     | 107.99(16) |
| Compound 2    |           |                       |            |                       |            |
| Zn(1)-O(2)    | 1.942(6)  | O(2)-Zn(1)-O(12)      | 130.4(2)   | O(6)-Zn(1)-O(10)      | 88.3(4)    |
| Zn(1)-O(12)   | 1.948(5)  | O(2)-Zn(1)-O(6)       | 95.6(3)    | O(2)-Zn(1)-O(11)      | 90.0(3)    |
| Zn(1)-O(6)    | 1.964(6)  | O(12)-Zn(1)-O(6)      | 134.1(3)   | O(12)-Zn(1)-O(11)     | 90.1(3)    |
| Zn(1)-O(10)   | 2.103(10) | O(2)-Zn(1)-O(10)      | 94.3(4)    | O(6)-Zn(1)-O(11)      | 91.4(4)    |
| Zn(1)-O(11)   | 2.123(9)  | O(12)-Zn(1)-O(10)     | 87.0(3)    | O(10)-Zn(1)-O(11)     | 175.7(3)   |
| Compound 3    |           |                       |            |                       |            |
| O(1)-Zn(1)    | 2.023(3)  | O(5)#2-Zn(1)-O(1)     | 107.51(11) | O(5)#2-Zn(1)-O(3)     | 84.30(12)  |
| O(3)-Zn(1)    | 2.170(3)  | O(1)-Zn(1)-O(3)       | 91.81(12)  | O(5)#2-Zn(1)-O(4)     | 103.74(12) |
| O(4)-Zn(1)    | 2.063(3)  | O(1)-Zn(1)-O(4)       | 148.35(12) | O(5)#2-Zn(1)-O(6)#4   | 92.26(12)  |
| O(5)-Zn(1)#2  | 2.006(3)  | O(1)-Zn(1)-O(6)#4     | 93.06(13)  | O(6)#4-Zn(1)-O(3)     | 174.71(13) |
| O(6)-Zn(1)#3  | 2.044(3)  | O(4)-Zn(1)-O(3)       | 86.38(12)  | O(6)#4-Zn(1)-O(4)     | 90.55(13)  |
| Compound 4'   |           |                       |            |                       |            |
| Co(1)-O(11)   | 2.026(3)  | O(16)-Co(1)-O(16)#2   | 75.92(11)  | O(1)-Co(1)-O(16)      | 135.08(11) |
| Co(1)-N(1)    | 2.062(4)  | N(1)-Co(1)-O(16)#2    | 171.32(13) | O(11)-Co(1)-O(16)     | 129.01(12) |
| Co(1)-O(1)    | 2.045(3)  | O(1)-Co(1)-O(16)#2    | 87.15(11)  | O(1)-Co(1)-N(1)       | 98.42(14)  |

|                    |          |                     |            |                     |            |
|--------------------|----------|---------------------|------------|---------------------|------------|
| Co(1)-O(16)#2      | 2.314(3) | O(11)-Co(1)-O(16)#2 | 87.34(11)  | O(11)-Co(1)-N(1)    | 99.21(14)  |
| Co(1)-O(16)        | 2.103(3) | N(1)-Co(1)-O(16)    | 95.48(14)  | O(11)-Co(1)-O(1)    | 90.45(12)  |
| <b>Compound 5</b>  |          |                     |            |                     |            |
| N(1)-Zn(1)         | 2.094(4) | O(11)-Zn(1)-O(8)#3  | 100.50(13) | O(1)-Zn(1)-N(1)     | 87.61(14)  |
| N(2)-Zn(1)         | 2.173(4) | O(11)-Zn(1)-O(1)    | 106.20(13) | O(11)-Zn(1)-N(2)    | 92.19(14)  |
| O(1)-Zn(1)         | 2.089(3) | O(8)#3-Zn(1)-O(1)   | 92.66(14)  | O(8)#3-Zn(1)-N(2)   | 95.87(15)  |
| O(8)-Zn(1)#1       | 2.043(3) | O(11)-Zn(1)-N(1)    | 102.45(14) | O(1)-Zn(1)-N(2)     | 157.95(14) |
| O(11)-Zn(1)        | 1.985(3) | O(8)#3-Zn(1)-N(1)   | 156.00(14) | N(1)-Zn(1)-N(2)     | 76.42(16)  |
| <b>Compound 6</b>  |          |                     |            |                     |            |
| Zn(1)-O(13)        | 1.972(4) | O(13)-Zn(1)-O(2)    | 100.88(16) | O(2)-Zn(1)-N(1)     | 95.20(15)  |
| Zn(1)-O(2)         | 2.041(4) | N(2)-Zn(1)-N(1)     | 77.44(16)  | O(2)-Zn(1)-N(2)     | 156.49(14) |
| Zn(1)-O(8)#1       | 2.087(4) | O(13)-Zn(1)-N(1)    | 91.35(15)  | O(2)-Zn(1)-O(8)#1   | 93.06(15)  |
| Zn(1)-N(2)         | 2.095(4) | O(13)-Zn(1)-N(2)    | 101.58(15) | O(8)#1-Zn(1)-N(1)   | 157.83(15) |
| Zn(1)-N(1)         | 2.181(4) | O(13)-Zn(1)-O(8)#1  | 107.24(14) | O(8)#1-Zn(1)-N(2)   | 86.86(15)  |
| <b>Compound 7</b>  |          |                     |            |                     |            |
| Zn(1)-O(5)#1       | 1.936(2) | O(5)#1-Zn(1)-O(1)   | 103.85(10) | O(1)-Zn(1)-N(1)     | 97.43(10)  |
| Zn(1)-O(1)         | 1.948(2) | O(5)#1-Zn(1)-N(2)#2 | 134.96(11) | N(2)#2-Zn(1)-N(1)   | 99.56(10)  |
| Zn(1)-N(1)         | 2.087(2) | O(1)-Zn(1)-N(2)#2   | 109.56(10) |                     |            |
| Zn(1)-N(2)#2       | 2.029(2) | O(5)#1-Zn(1)-N(1)   | 105.21(11) |                     |            |
| <b>Compound 8</b>  |          |                     |            |                     |            |
| N(1)-Zn(1)         | 2.022(5) | O(1)-Zn(1)-O(3)#4   | 107.24(18) | O(3)#4-Zn(1)-N(2)#5 | 106.2(2)   |
| N(2)-Zn(1)#2       | 2.066(5) | O(1)-Zn(1)-N(1)     | 111.64(19) | N(1)-Zn(1)-N(2)#5   | 99.4(2)    |
| O(1)-Zn(1)         | 1.927(4) | O(3)#4-Zn(1)-N(1)   | 128.6(2)   |                     |            |
| Zn(1)-O(3)#4       | 1.942(4) | O(1)-Zn(1)-N(2)#5   | 99.3(2)    |                     |            |
| <b>Compound 9</b>  |          |                     |            |                     |            |
| N(1)-Zn(1)         | 2.048(5) | O(1)-Zn(1)-O(4)#4   | 104.29(18) | O(4)#4-Zn(1)-N(1)   | 108.6(2)   |
| O(1)-Zn(1)         | 1.954(4) | O(1)-Zn(1)-N(4)#5   | 113.81(19) | N(4)#5-Zn(1)-N(1)   | 106.8(2)   |
| O(4)-Zn(1)#3       | 1.974(5) | O(4)#4-Zn(1)-N(4)#5 | 121.6(2)   |                     |            |
| Zn(1)-N(4)#5       | 2.025(5) | O(1)-Zn(1)-N(1)     | 99.50(19)  |                     |            |
| <b>Compound 10</b> |          |                     |            |                     |            |
| N(1)-Zn(1)         | 2.073(4) | Zn(1)-N(4)#5        | 2.022(4)   | O(4)#4-Zn(1)-O(1)   | 110.66(14) |
| N(4)-Zn(1)#2       | 2.023(4) | O(4)#4-Zn(1)-N(1)   | 105.70(16) | O(4)#4-Zn(1)-N(4)#5 | 129.47(15) |
| O(1)-Zn(1)         | 1.952(3) | O(1)-Zn(1)-N(1)     | 97.13(14)  | O(1)-Zn(1)-N(4)#5   | 107.62(14) |
| Zn(1)-O(4)#4       | 1.938(3) | N(4)#5-Zn(1)-N(1)   | 100.89(16) |                     |            |

Symmetry transformations used to generate equivalent atoms: #1  $x+1, y+1, z$ , #2  $x+2, y, z-1$ , #3  $-x+1, -y+1, -z$ , #4  $x, y-1, z$ , #5  $-x-1, -y+1, -z+1$ , #6  $-x, -y, -z+1$ , #7  $x-2, y, z+1$ , #8  $x, y+1, z$ , #9  $-x-1, -y+2, -z+1$ , #10  $x-1, y-1, z$  for **1**; #1  $-x+1, -y+1, -z+1$ , #2  $-x+1, -y+1, -z$ , #3  $-x, -y, -z$  for **2**; #1  $-x+1, y, -z+5/2$ , #2  $-x+1/2, -y+1/2, -z$ , #3  $-x+1/2, y+1/2, -z+1/2$ , #4  $-x+1/2, y-1/2, -z+1/2$  for **3**; #1  $-x+1, -y+1, -z-1$ , #2  $-x+1, -y+1, -z$  for **4**; #1  $x, y, z-1$ , #2  $x, y, z+1$ , #3  $-x+3, -y+3, -z+1$  for **5**; #1  $x, y, z+1$ , #2  $-x, -y-1, -z+1$ , #3  $x, y, z-1$  for **6**. #1  $x+1/2, -y+3/2, z+1/2$ , #2  $-x+5/2, y+1/2, -z+3/2$ , #3  $-x+5/2, y-1/2, -z+3/2$ , #4  $-x-1, -y+2, -z+1$ , #5  $x-1/2, -y+3/2, z-1/2$  for **7**; #1  $-x-2, -y+1, -z+1$ , #2  $-x+3/2, y+1/2, -z+3/2$ , #3  $x-1/2, -y+1/2, z-1/2$ , #4  $x+1/2, -y+1/2, z+1/2$ , #5  $-x+3/2, y-1/2, -z+3/2$  for **8**; #1  $-x-2, -y+1, -z$ , #2  $-x+3/2, y+1/2, -z+1/2$ , #3  $x-1/2, -y+3/2, z-1/2$ , #4  $x+1/2, -y+3/2, z+1/2$ , #5  $-x+3/2, y-1/2, -z+1/2$  for **9**; #1  $-x+4, -y, -z$ , #2  $-x+1, y+1/2, -z+1/2$ , #3  $x, -y+1/2, z-1/2$ , #4  $x, -y+1/2, z+1/2$ , #5  $-x+1, y-1/2, -z+1/2$  for **10**.

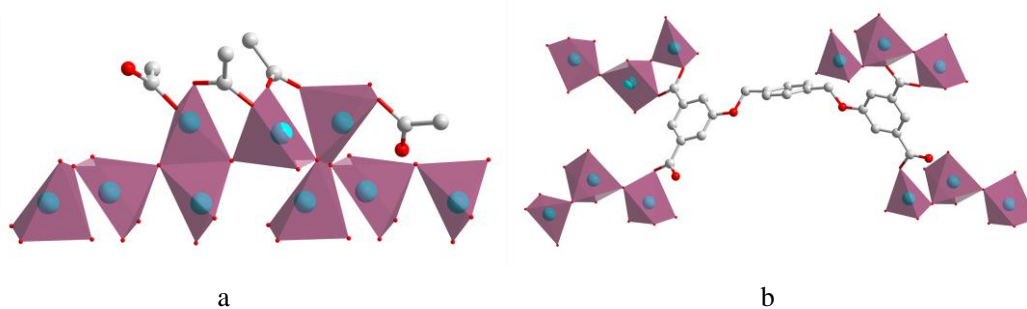

**Fig. S1** a) Each Zn<sub>3</sub> cluster is linked by four L1 ligands and two Zn<sub>3</sub> clusters. b) Each L1 ligand links four Zn<sub>3</sub> clusters in compound **1**.

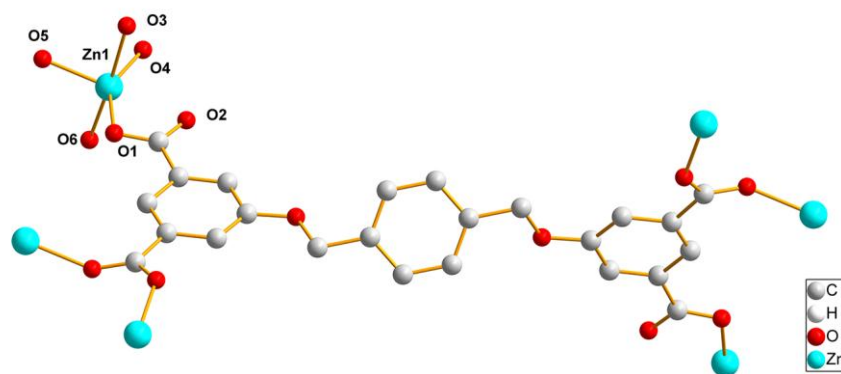

**Fig. S2** The coordination geometries of Zn<sup>II</sup> Center in compound **3**

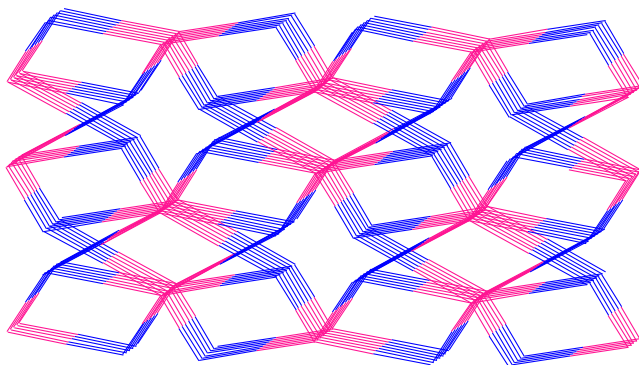

**Fig. S3** (3.6)-connected 2-nodal net with a ant topology in **3**. (blue for 3-connected node and red for 6-connected node)

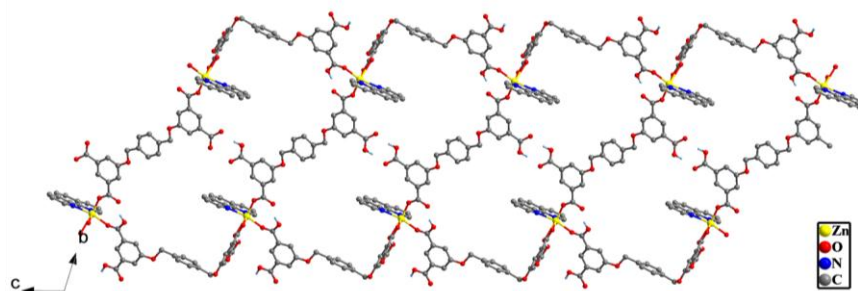

**Fig. S4** 1D ladder-like chain structure of **6** viewed down from a axis, the lattice water and hydrogen atoms are omitted for clarity.

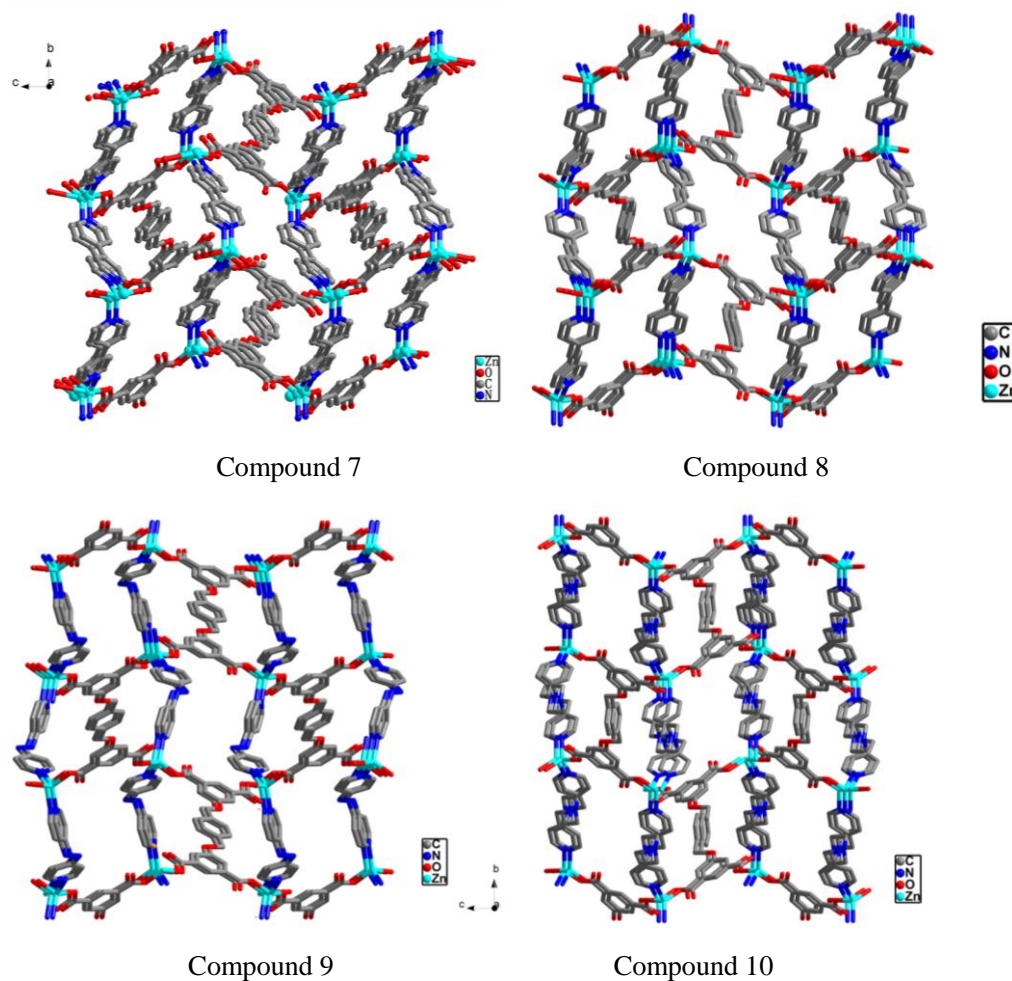

**Fig. S5** 3D structure of compounds 7~10.

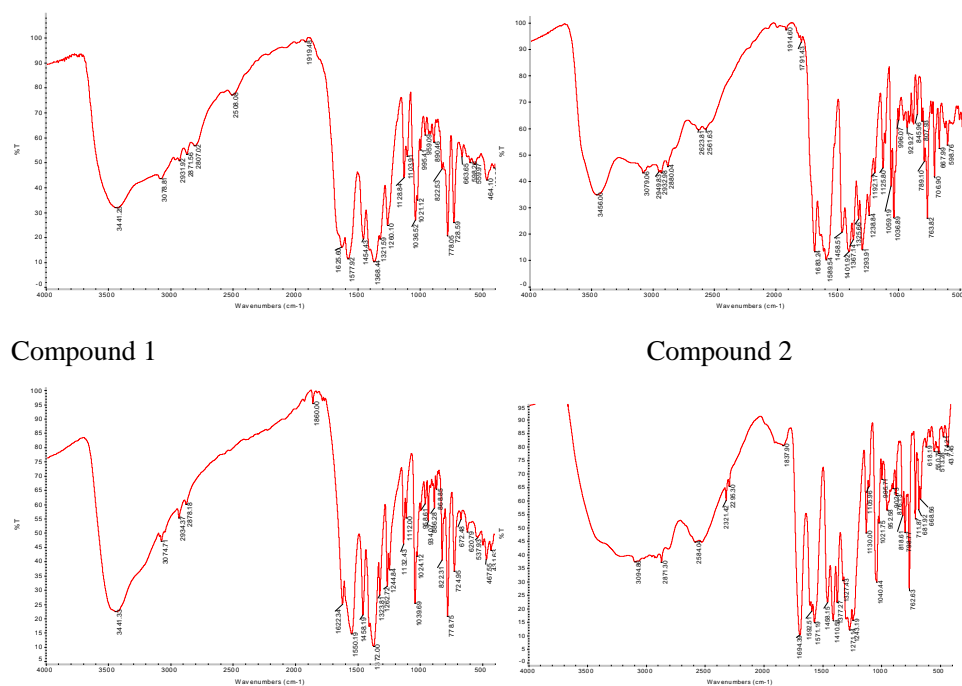

Compound 3

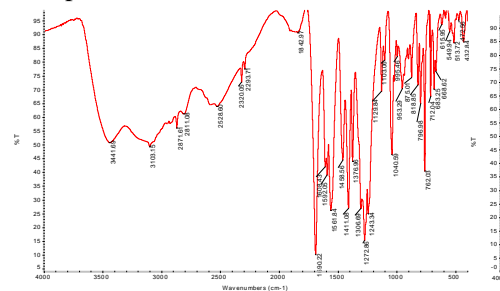

Compound 4

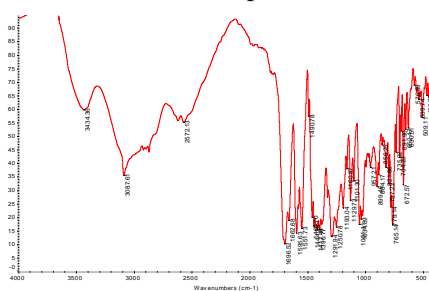

Compound 4'

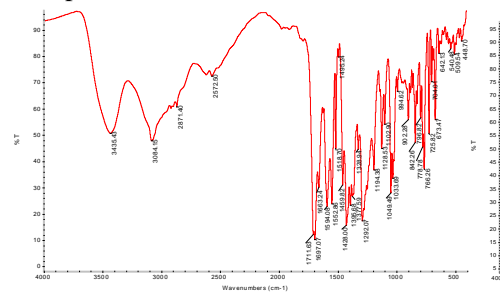

Compound 5

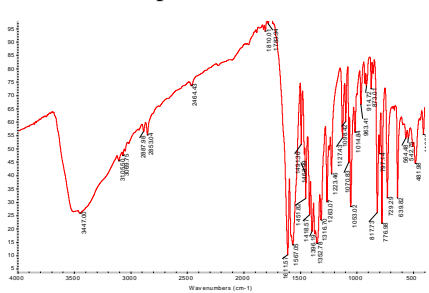

Compound 6

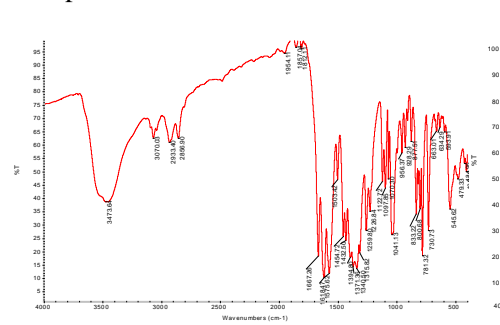

Compound 7

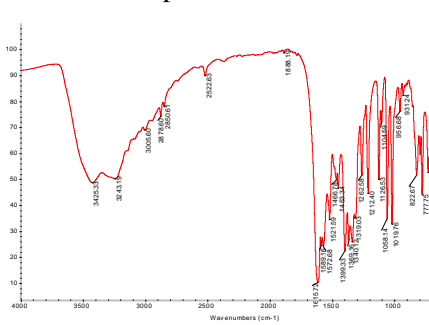

Compound 8

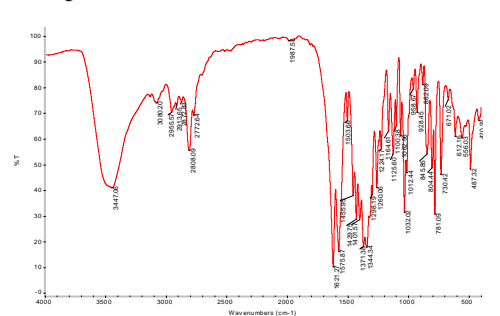

Compound 9



Compound 10

Fig. S6 IR Spectra of compounds 1~10.

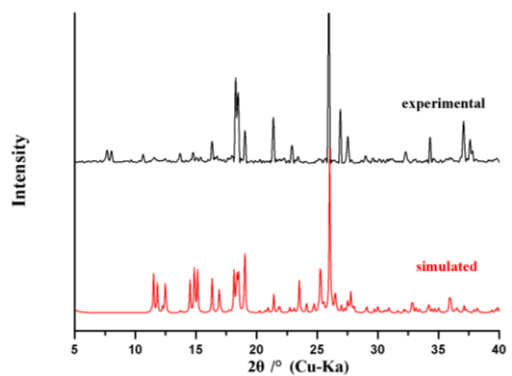

Compound 1

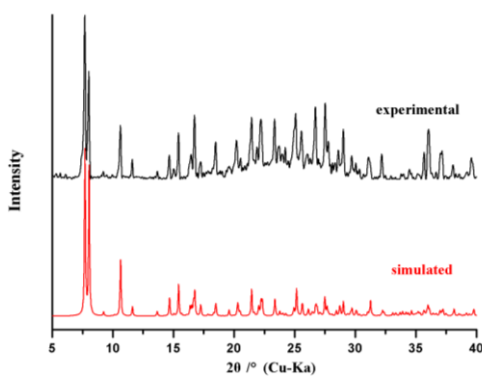

Compound 2

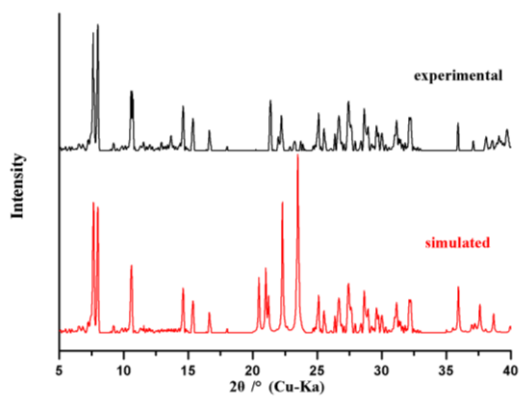

Compound 3

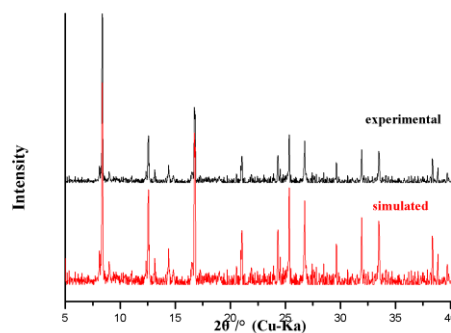

Compound 4

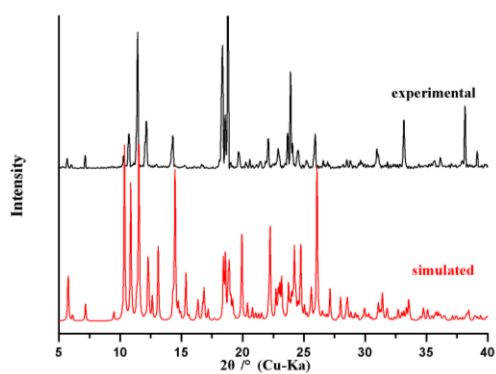

Compound 5

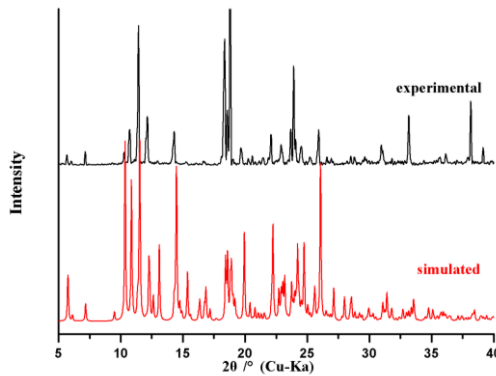

Compound 6

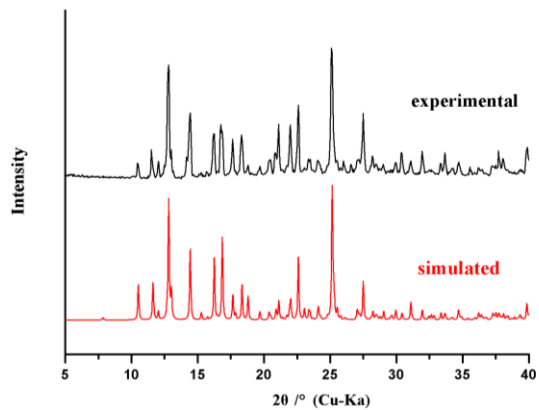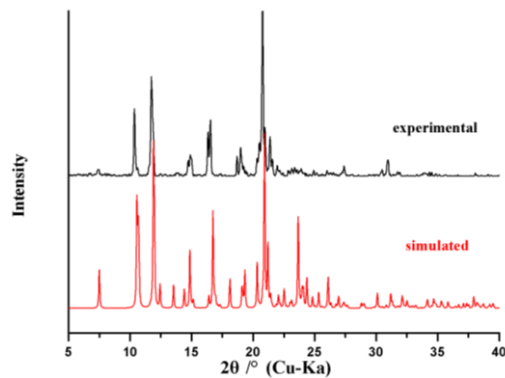

Compound 7

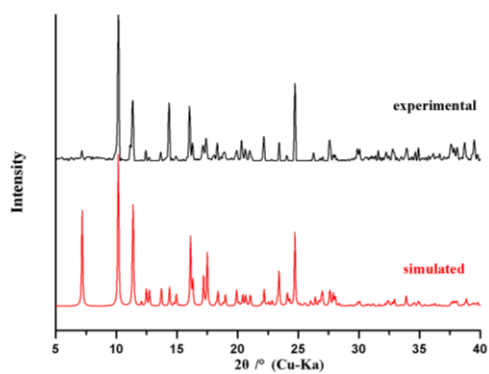

Compound 8

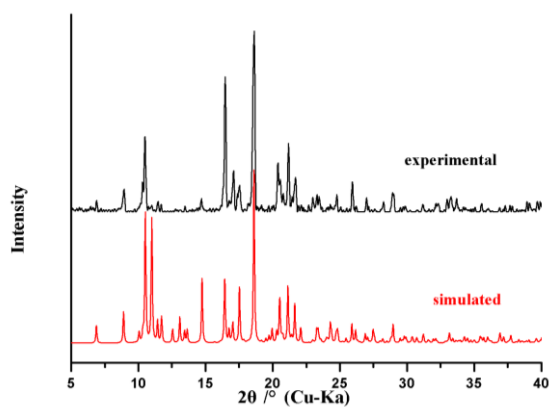

Compound 9

Compound 10

Fig S7 Powder X-ray diffractions (PXRD) for complexes **1-10**.

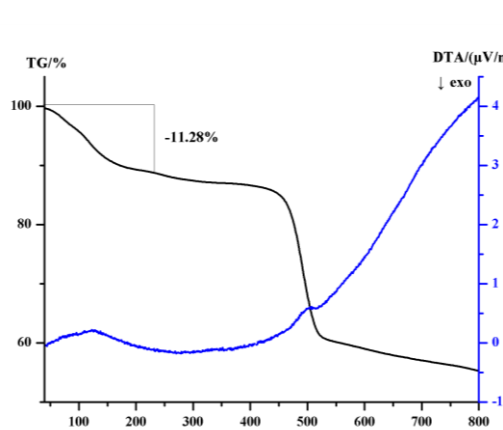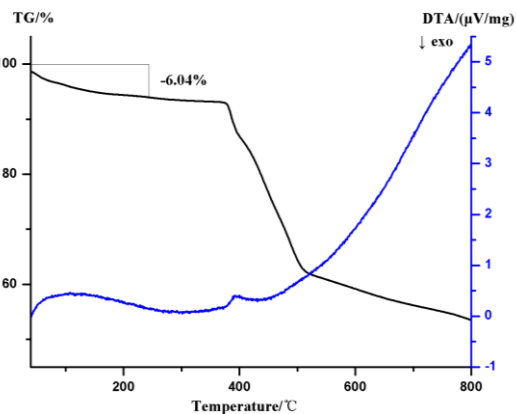

Compound 1

Compound 2

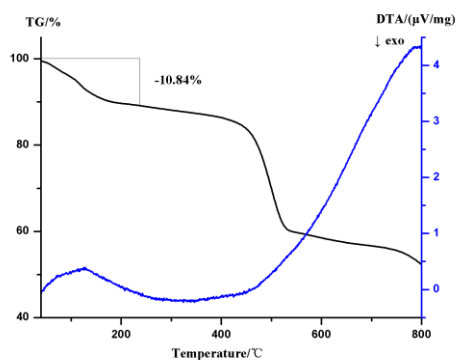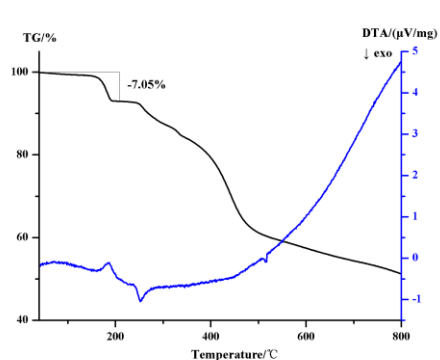

Compound 3

Compound 4

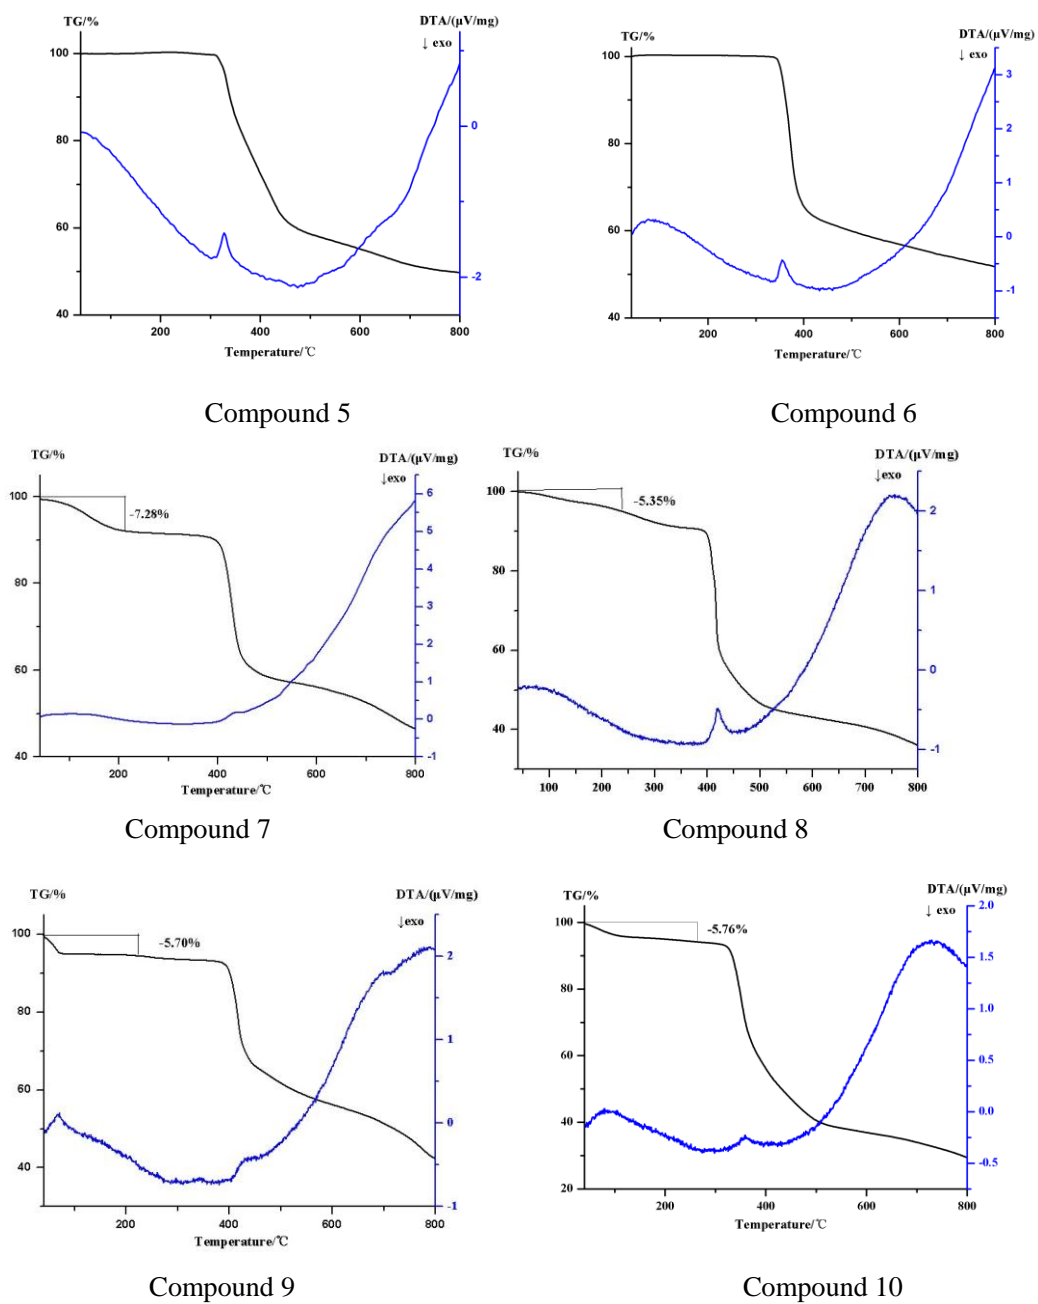

Fig S8 TGA curve for compounds 1-10.
